# Supplementary material
Source: Springer Nature journal article supplement (https://www.springermedizin.de/resource/supplementary/12913_2013_2869_MOESM2_ESM.pdf/9531720)

# Percentage with check-up at last visit

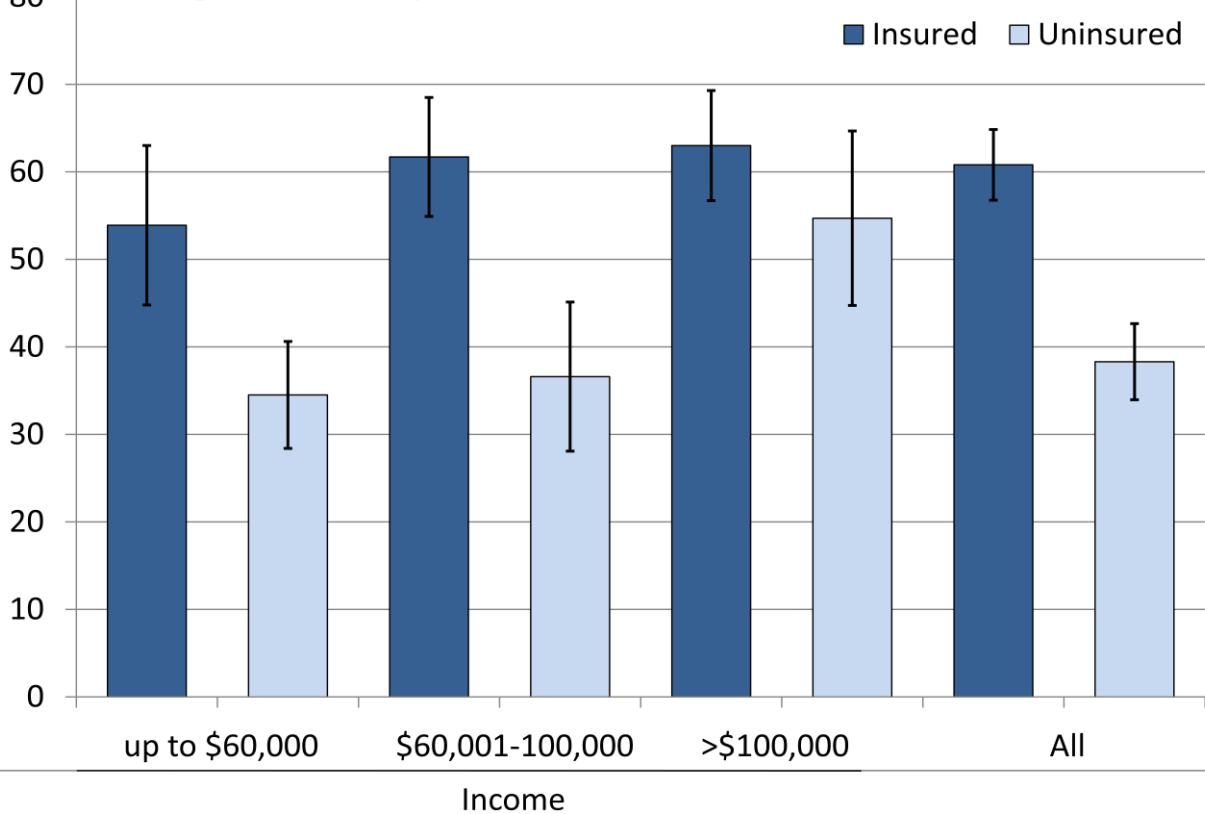

Supplement: MOESM2 [file 9531720]
